# Supplementary material for: Single Versus Double Dose Praziquantel Comparison on Efficacy and Schistosoma mansoni Re-Infection in Preschool-Age Children in Uganda: A Randomized Controlled Trial
Source: PLOS journal article supplement (doi:10.1371/journal.pntd.0003796), 2015-05-26
Supplement: S2 (10.1371/journal.pntd.0003796.s002) [file journal.pntd.0003796.s002]

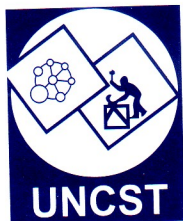

# Uganda National Council for Science and Technology

(Established by Act of Parliament of the Republic of Uganda)

Our Ref: HS 1274

19<sup>th</sup> November 2012

Dr. Allen Nalugwa  
Child Health and Development Centre  
Makerere University College of Health Sciences  
Kampala

Dear Dr. Nalugwa,

**RE: RESEARCH PROJECT, "INTESTINAL SCHISTOSOMIASIS IN CHILDREN AGED 1-5 YEARS, MORBIDITY ASSESSMENT AND THE EFFECT OF PRAZIQUANTEL ON MORBIDITY-JINJA DISTRICT, UGANDA"**

This is to inform you that the Uganda National Council for Science and Technology (UNCST) approved the above research proposal on **30<sup>th</sup> October 2012**. The approval will expire on **30<sup>th</sup> October 2013**. If it is necessary to continue with the research beyond the expiry date, a request for continuation should be made in writing to the Executive Secretary, UNCST.

Any problems of a serious nature related to the execution of your research project should be brought to the attention of the UNCST, and any changes to the research protocol should not be implemented without UNCST's approval except when necessary to eliminate apparent immediate hazards to the research participant(s).

This letter also serves as proof of UNCST approval and as a reminder for you to submit to UNCST timely progress reports and a final report on completion of the research project.

Yours sincerely,

Jane Nabbuto  
for: Executive Secretary

**UGANDA NATIONAL COUNCIL FOR SCIENCE AND TECHNOLOGY**

---

**LOCATION/CORRESPONDENCE**

Plot 6 Kimera Road, Ntinda  
P. O. Box 6884  
KAMPALA, UGANDA

**COMMUNICATION**

TEL: (256) 414 705500, (256) 312 314800  
FAX: (256) 414-234579  
EMAIL: [info@uncst.go.ug](mailto:info@uncst.go.ug)  
WEBSITE: <http://www.uncst.go.ug>
